# Supplementary material for: Intratumoral modulation of the inducible co-stimulator ICOS by recombinant oncolytic virus promotes systemic anti-tumour immunity
Source: PubMed Central journal article supplement (PMC5316835; doi:10.1038/ncomms14340), 2017-02-13
Supplement: ncomms14340-s1.pdf [file ncomms14340-s1.pdf]

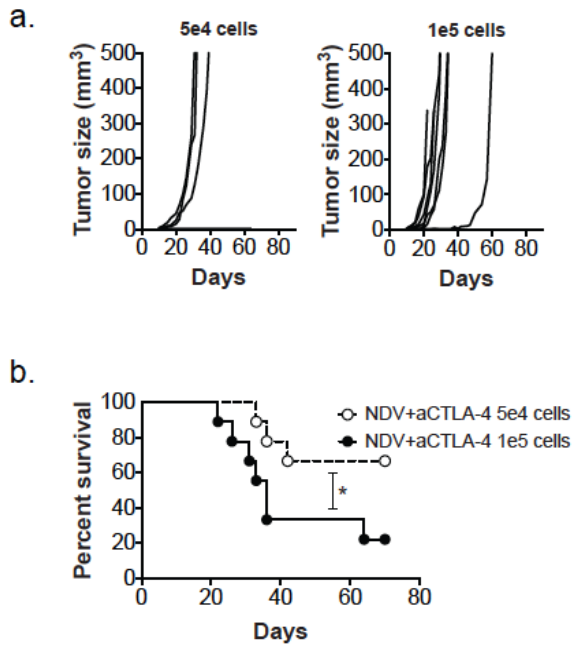

**Supplementary Figure 1. Therapeutic efficacy of combined NDV and anti-CTLA-4 therapy is attenuated with a larger tumor challenge.** Bilateral flank B16-F10 tumors were established as described and the animals were treated with 4 intratumoral injections to the right tumor. a) Growth of distant tumors. b). Overall survival. \* $p < 0.05$ . Pooled data from 2 experiments with 5 animals per group.

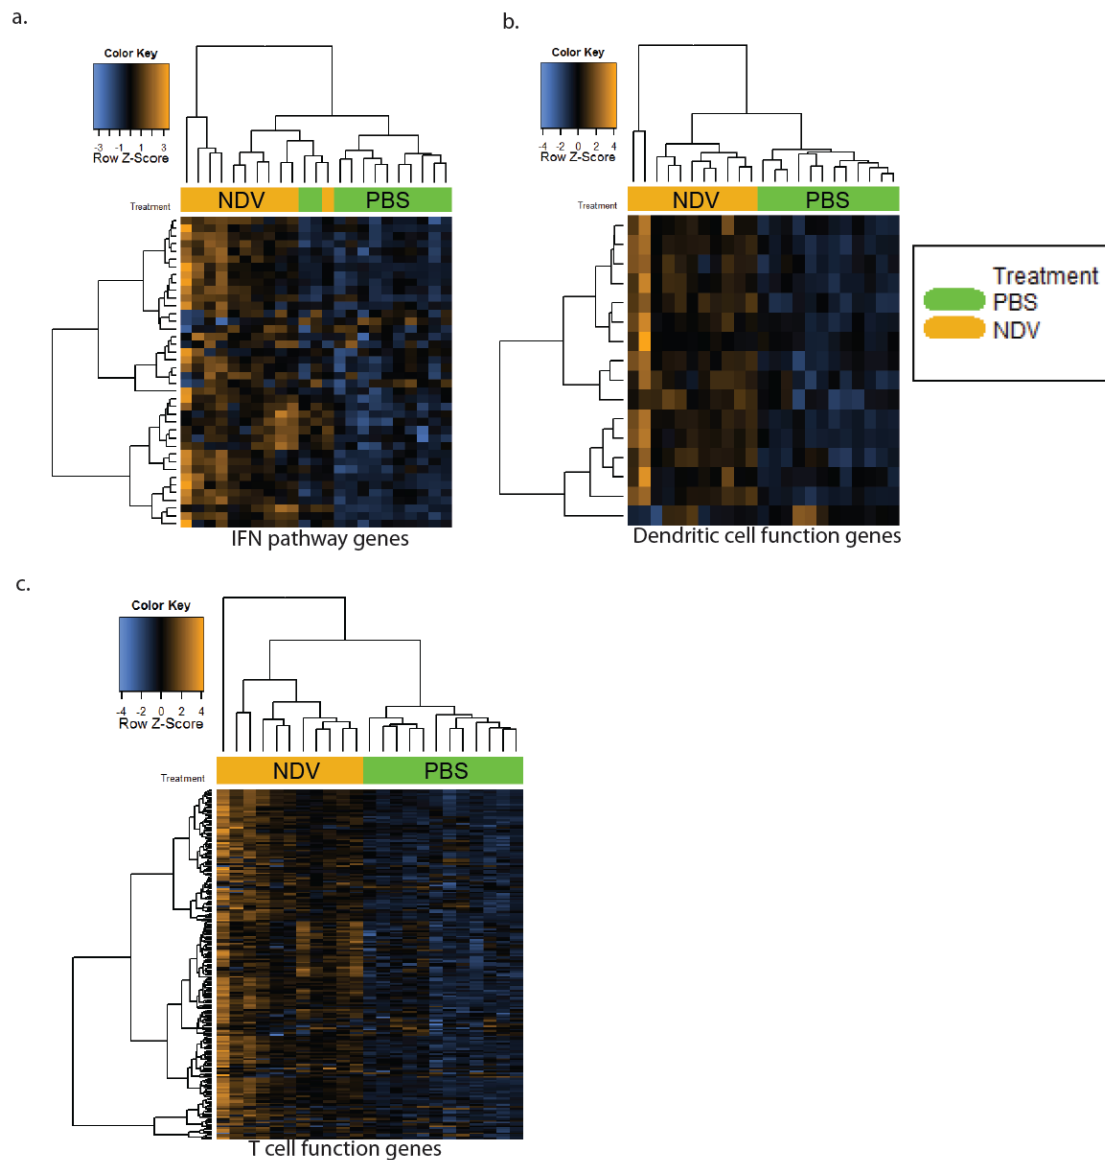

**Supplementary Figure 2. Upregulation of immune-related genes in response to NDV.** RNA isolated from NDV-infected tumors was subjected to gene expression analysis using the Nanostring Mouse Pancancer Immune Profiling panel. a) Type I interferon pathway genes. b) Dendritic cell function genes. c) T cell function genes. The actual genes, level of induction, and statistical significance are outlined in Supplementary Tables 1-3. Representative data from 2 experiments with 10 animals per group.

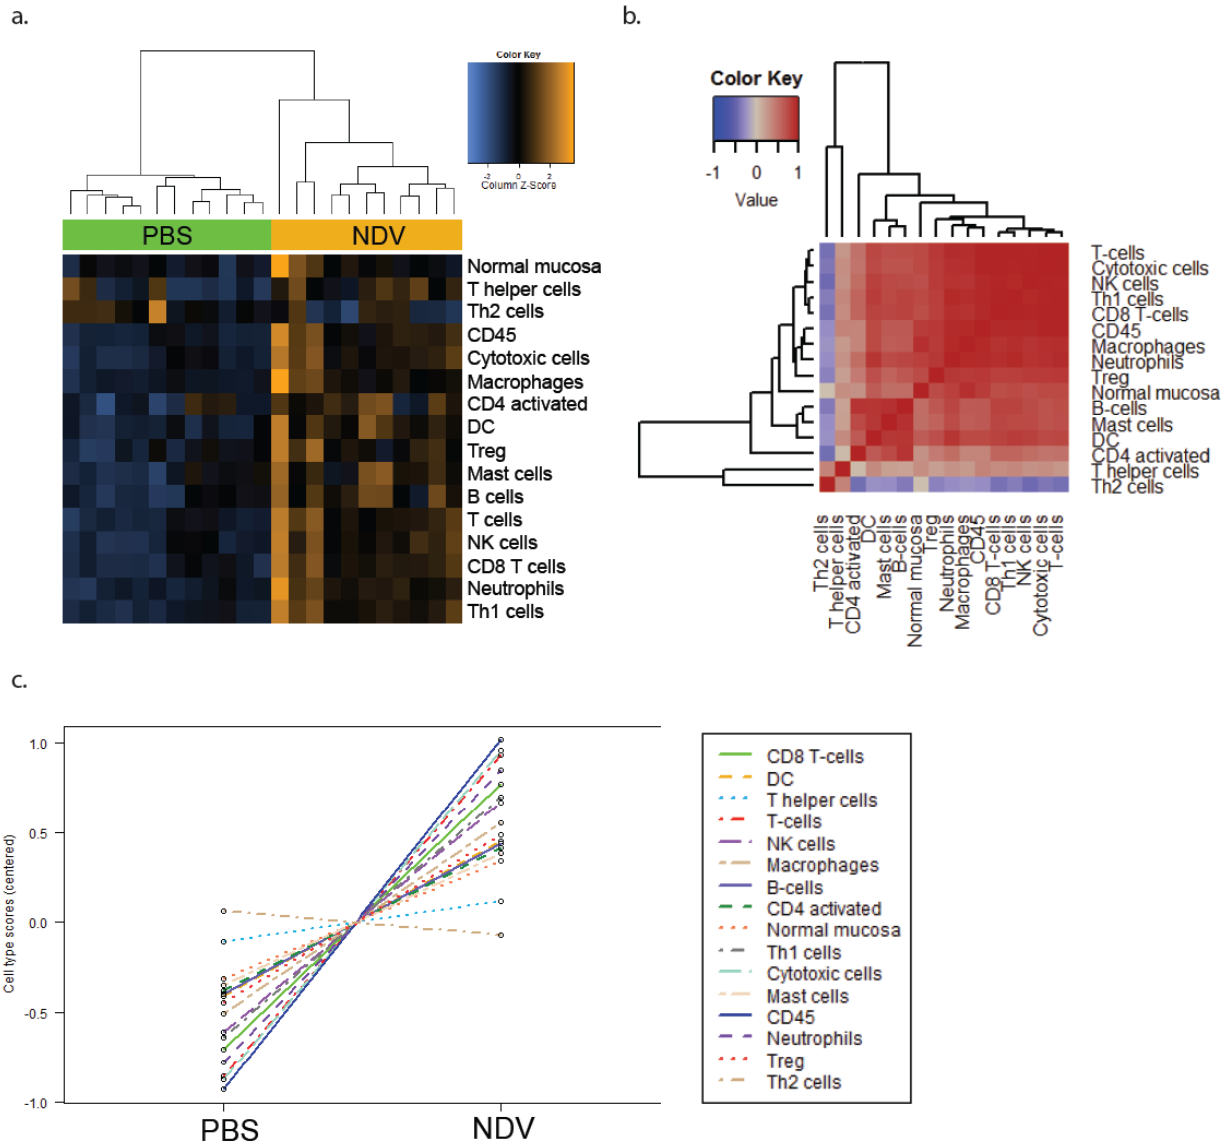

**Supplementary Figure 3. NDV infection induces immune transcriptional signatures defining Th1 and CTL, but not Th2 responses.** RNA isolated from NDV-infected tumors was subjected to gene expression analysis using the Nanostring Mouse Pancancer Immune Profiling panel. Immune cell subtypes were defined based on the transcriptional signatures developed by Bindea et al. (48). a) Heatmap showing raw abundance of immune cell types in each sample, compared to other samples. Orange indicates high abundance; blue indicates low abundance. b) Heatmap showing the correlation matrix of raw immune cell abundance. Red and blue indicate positive and negative correlation, respectively. c) Covariate plot of raw cell type abundance measurements of treated vs. control samples. Representative data from 2 experiments with 10 animals per group.

a.

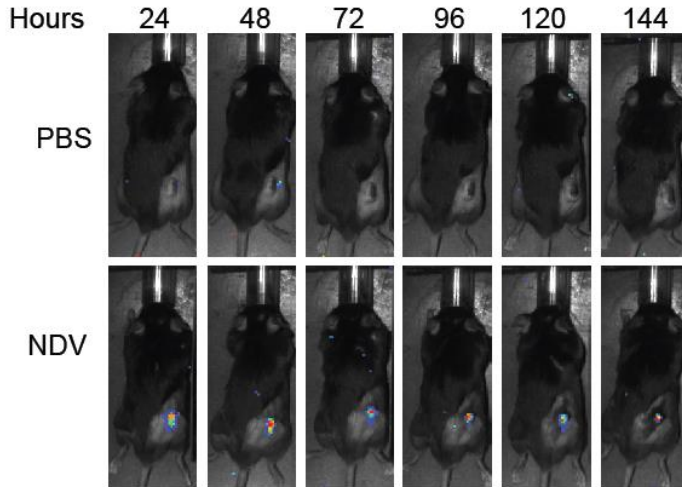

b.

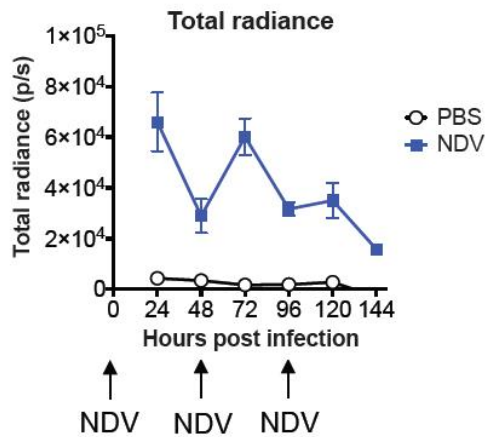

c.

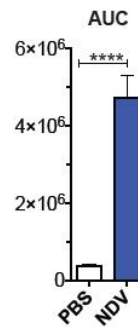

**Supplementary Figure 4. Expression of transgene from NDV *in vivo*.** Animals bearing flank B16-F10 tumors were injected intratumorally with NDV expressing firefly luciferase (NDV-fluc) on the indicated days and analyzed on IVIS Imaging System. a) Representative luminescence images. b) Quantified total radiance from tumor area in photons per second (p/s). c) Area under the curve (AUC) calculated from (b). Representative data from 2 experiments with 5 animals per group. Data with error bars represent mean  $\pm$  SEM. \*\*\*\* $p < 0.0001$ .

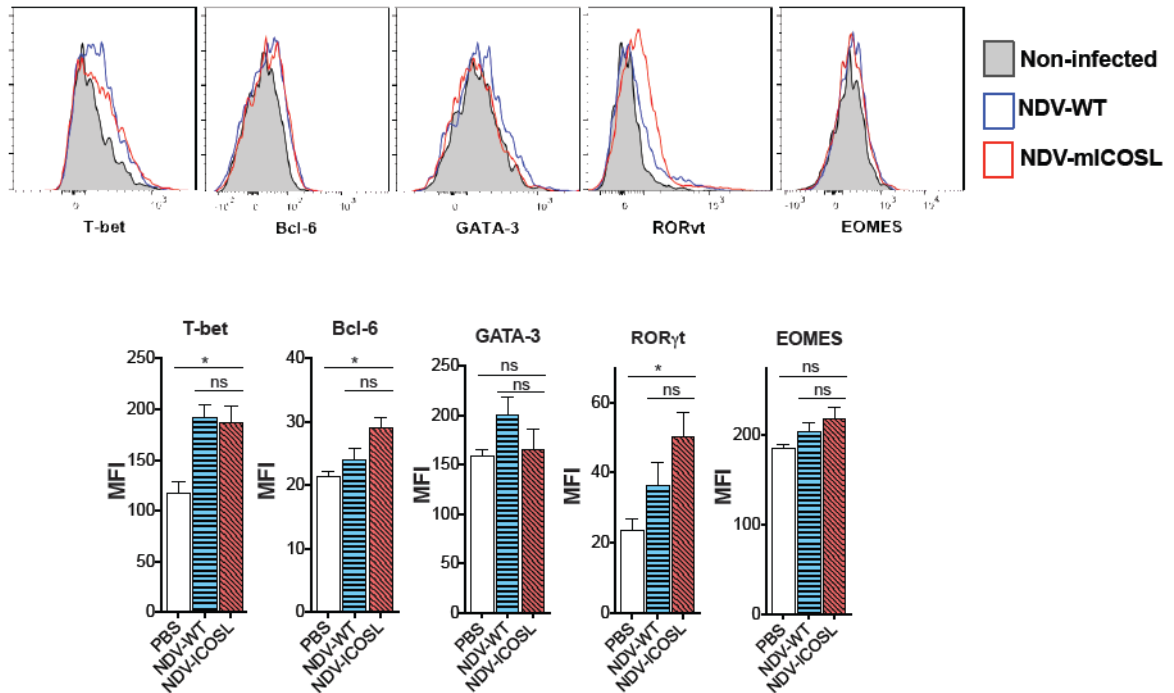

**Supplementary Figure 5. Expression of lineage-specific transcription factors in the CD4+FoxP3- tumor lymphocyte subsets.** Top: flow cytometry plots gated on the CD4+FoxP3- (Tcon) TIL population. Bottom: Median fluorescence intensity values calculated from the plots above with average of 5 animals per group. \* $p < 0.05$ , ns: non-significant. Data with error bars represent mean  $\pm$  SEM.

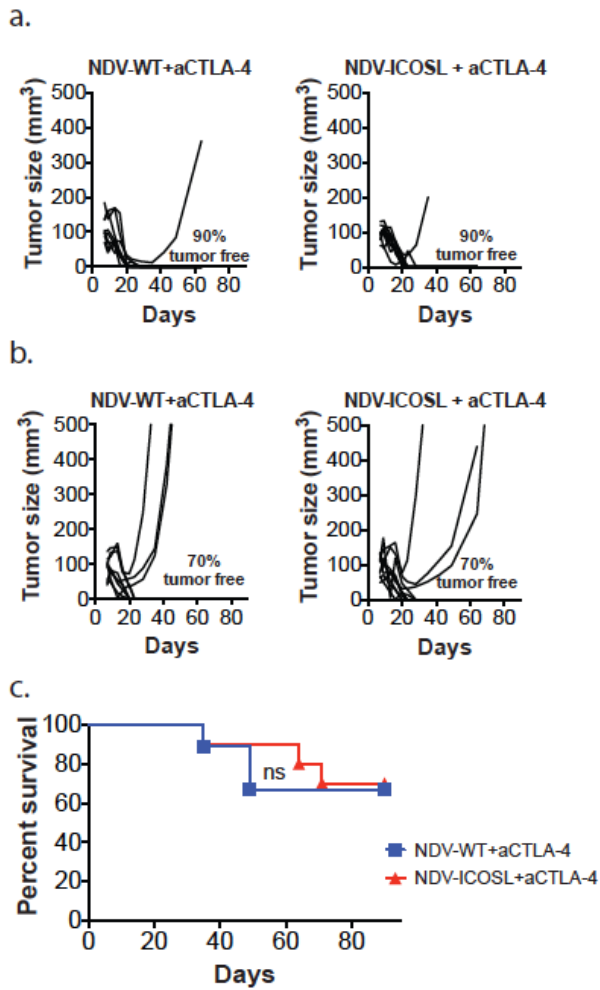

**Supplementary Figure 6. Efficacy of NDV-ICOSL in non-NDV-permissive tumor cell line.**

MB49 tumor cells were titrated to establish a model that resulted in 100% tumor take and 0% survival in untreated animals. Animals bearing bilateral flank MB49 tumors were treated intratumorally into the right tumor with the indicated NDV and intraperitoneally with anti-CTLA-4 antibody. a) Growth of individual right (virus-injected) tumors. b) Growth of distant tumors. c) Overall survival. ns: non-significant. Pooled data from 2 experiments with 5-10 animals per group.

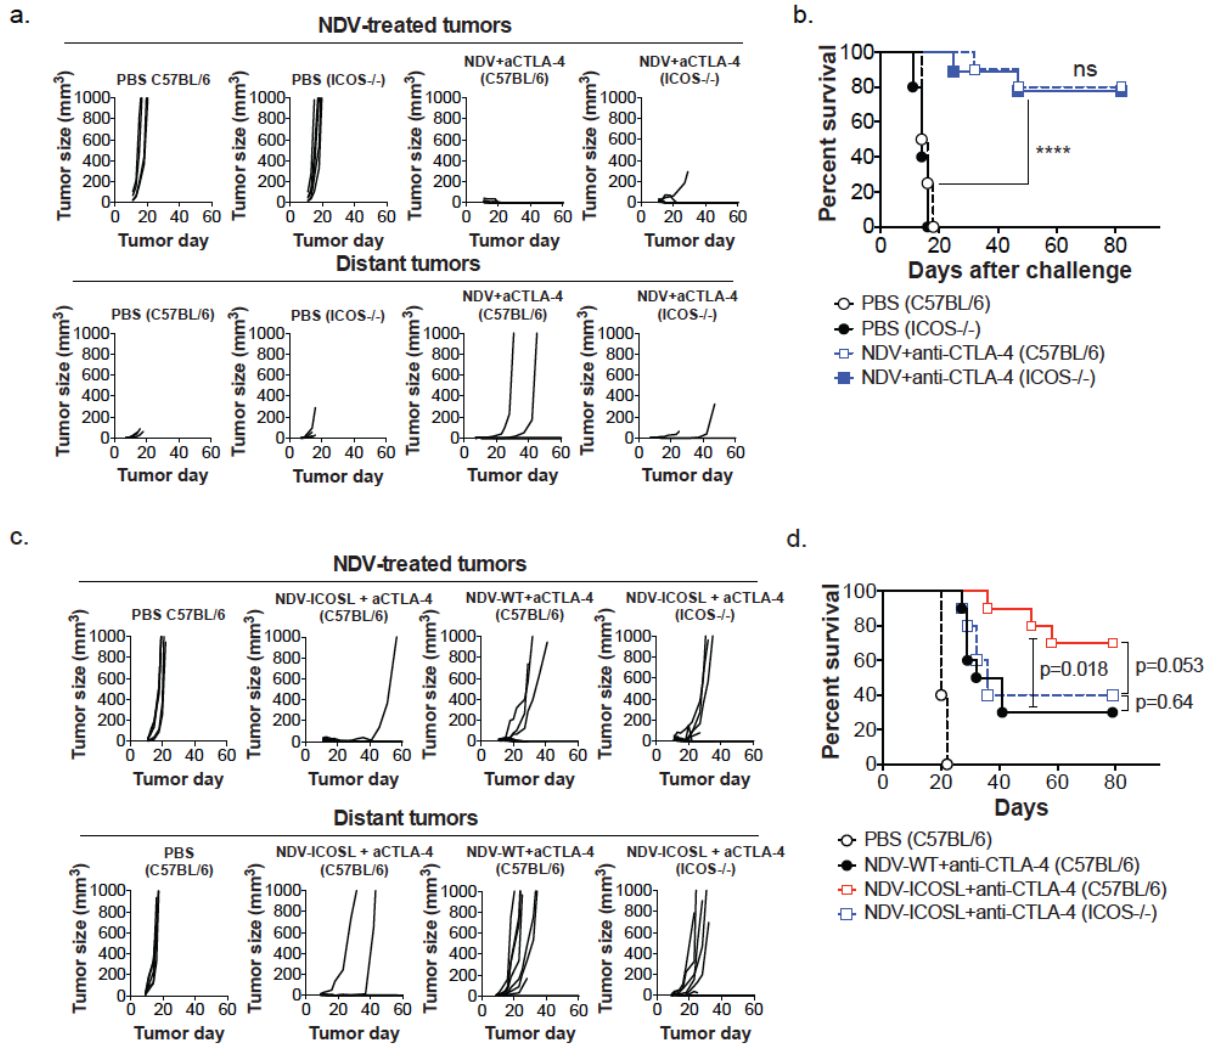

**Supplementary Figure 7. Efficacy of NDV in ICOS-deficient mice.** C57BL/6 ICOS<sup>-/-</sup> animals or sex and age-matched C57BL/6 controls were challenged with B16-F10 cells  $1 \times 10^5$  cells in right flank and  $5 \times 10^4$  cells in the left flank (a-b) or  $1 \times 10^5$  cells in the left flank (c-d) and were treated intratumorally with the indicated viruses and intraperitoneal anti-CTLA-4 antibody according to the schedule in figure 4b. a) Growth of individual treated and distant tumors with small tumor challenge and treatment with NDV-WT/anti-CTLA-4 combination. b) Overall survival with small tumor challenge and treatment with NDV-WT/anti-CTLA-4 combination. c) Growth of individual treated and distant tumors with larger tumor challenge and treatment with NDV-ICOSL/anti-CTLA-4 combination. d) Overall survival with small tumor challenge and treatment with NDV-ICOSL/anti-CTLA-4 combination. Pooled data from 2 experiments with 5 animals per group. \*\*\* $p < 0.0001$ .

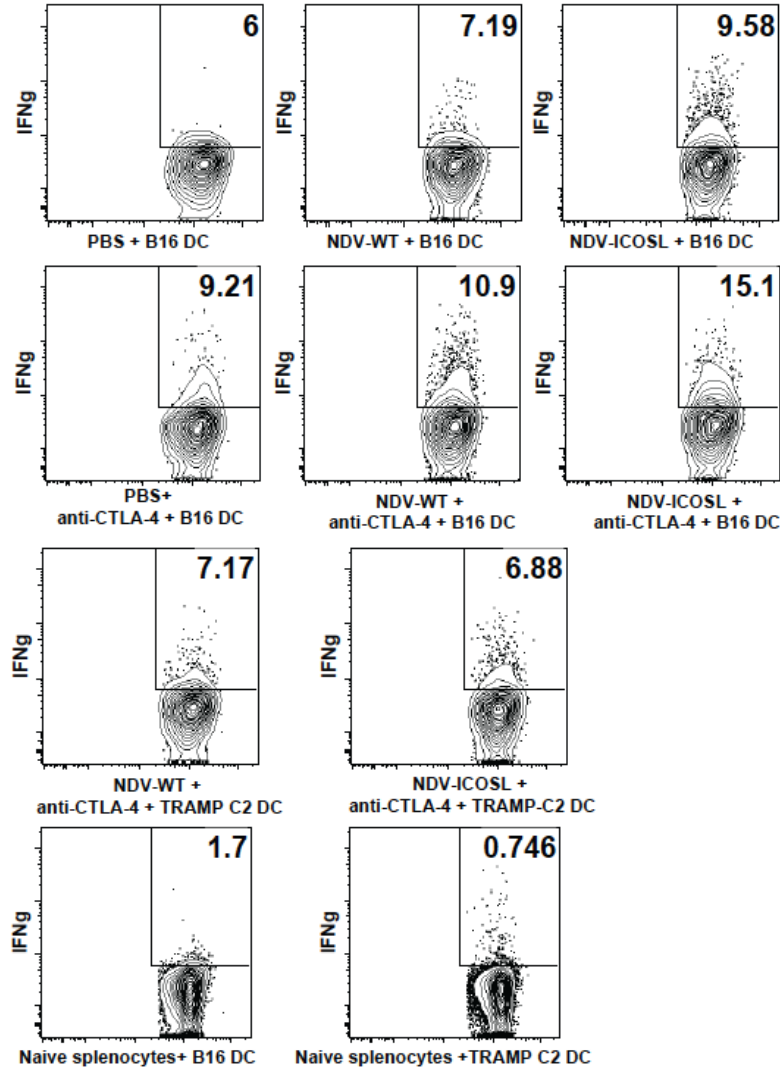

**Supplementary Figure 8. Expression of IFN $\gamma$  by tumor-infiltrating CD8+ lymphocytes in response to antigen.** Splenic DC's loaded with B16-F10 or TRAMP-C2 tumor cell lysates were co-cultured with tumor T cells or naïve splenic T cells in a 1:5 (DC:lymphocyte) ratio for 8 hours. T cells were analyzed for IFN $\gamma$  production by intracellular cytokine staining. Representative flow cytometry panels for each group and the controls are shown. Composite data for the analyses is shown in figure 5j.



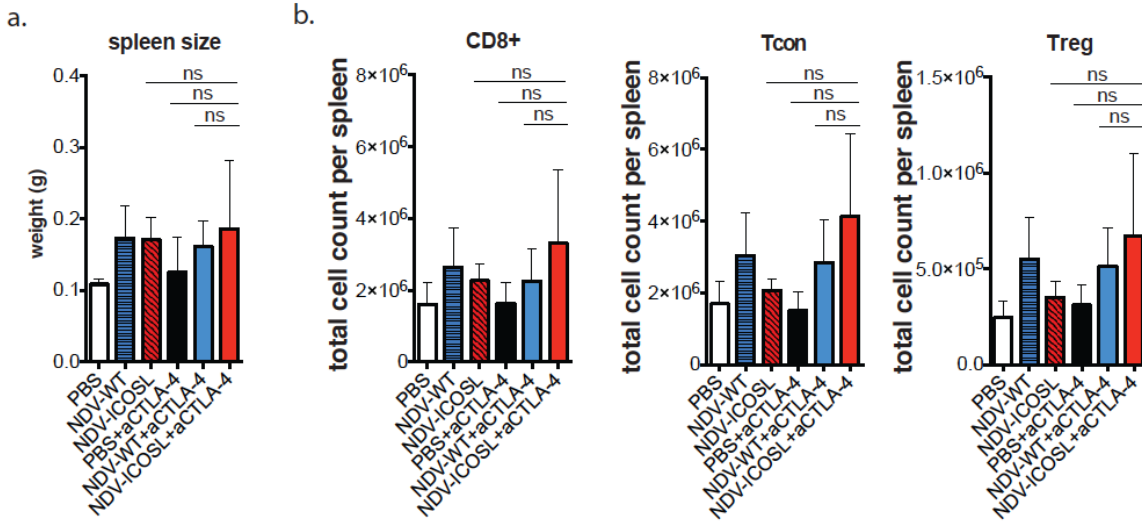

**Supplementary Figure 9. Composition of splenic T cell populations.**

Animals were treated according to the schedule in Figure 4b and spleens were collected on day 15. a) Spleen size in grams, b) Total calculated CD8+, Tcon, and Treg lymphocytes per gram of spleen. Data with error bars represent mean  $\pm$  SEM. Representative data from 2 experiments with 5 mice per group. ns: non-significant.

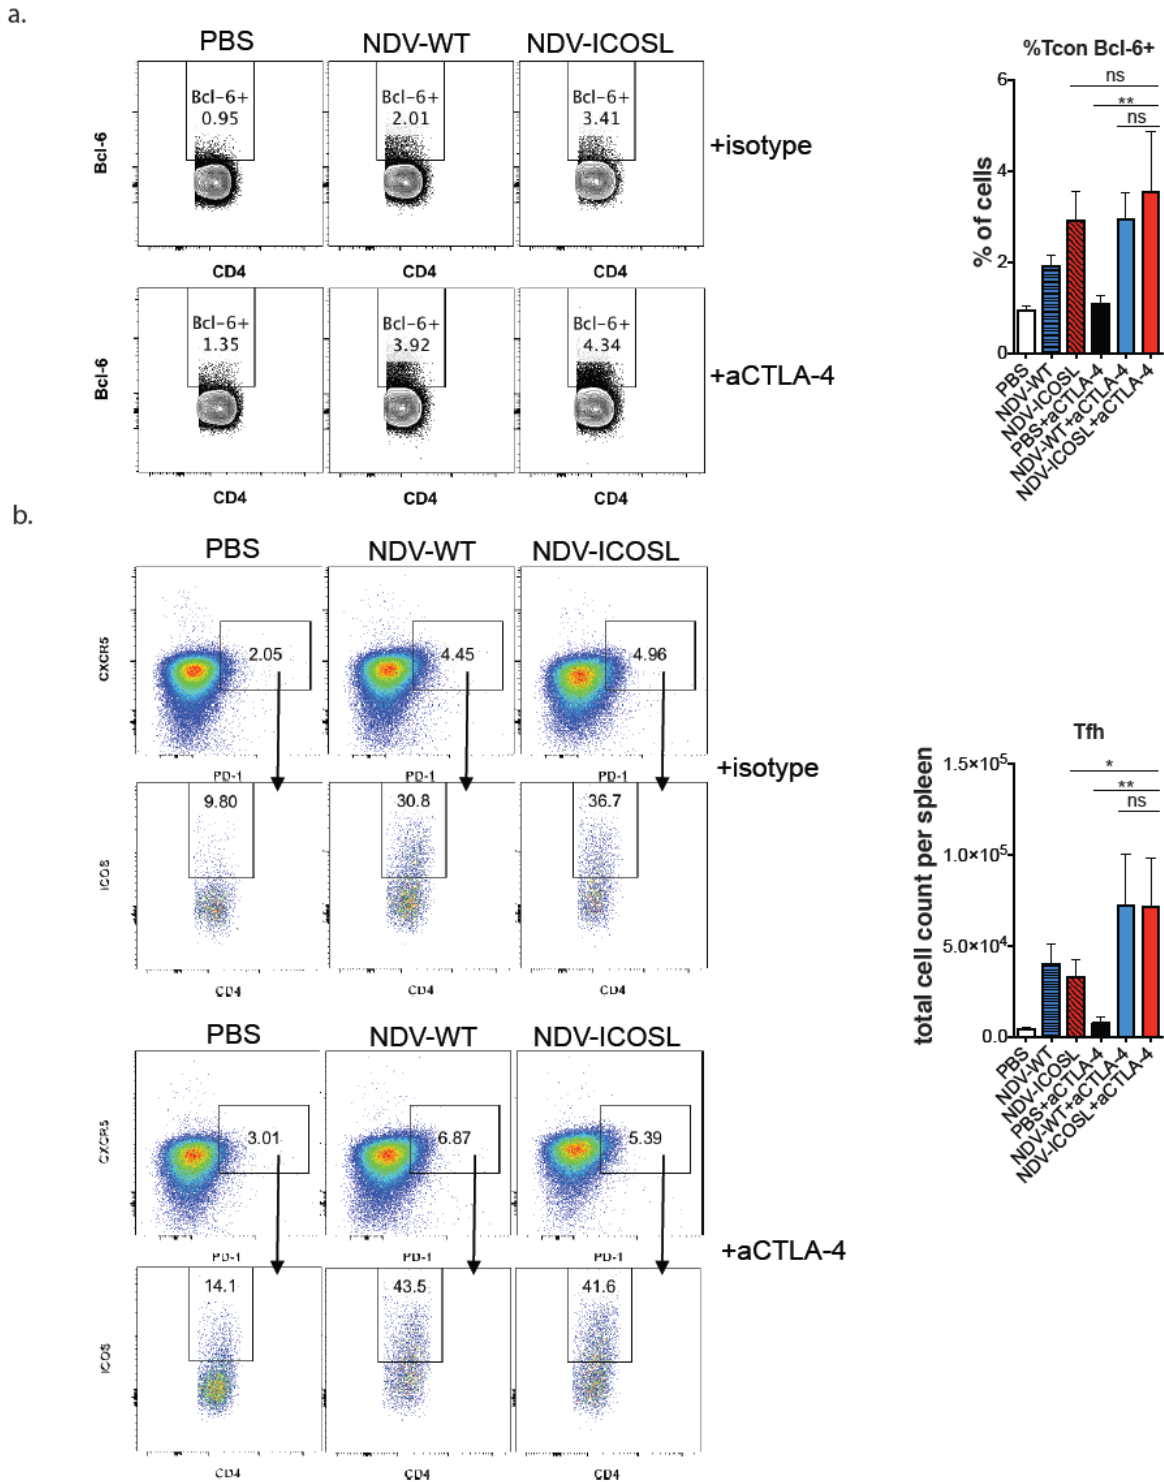

**Supplementary Figure 10. Effect of NDV-ICOSL and CTLA-4 blockade on the splenic follicular helper T cells.** Animals were treated according to the schedule specified in figure 4b and the spleens were collected on day 15. a) Expression of bcl-6 in CD4<sup>+</sup>FoxP3<sup>-</sup> (Tcon) subset. b) Overall percentages and gating strategy (left) and calculated absolute counts (right) of the splenic Tfh cells, as defined by CD4<sup>+</sup>FoxP3<sup>-</sup>PD-1<sup>+</sup>CXCR5<sup>+</sup>ICOS<sup>+</sup> lineage. Representative data of 2 experiments with 5 mice per group. Data with error bars represent mean +/- SEM. \*p<0.05, \*\*p<0.01, ns: non-significant.

**Supplementary Table 1. Upregulation of genes related to type I interferon.**

| <b>Gene</b> | <b>Log2 fold change</b> | <b>Lower confidence limit</b> | <b>Upper confidence limit</b> | <b>P-value</b> |
|-------------|-------------------------|-------------------------------|-------------------------------|----------------|
| Ifitm1      | 1.28                    | 0.87                          | 1.69                          | 4.71E-06       |
| Ifih1       | 0.367                   | 0.239                         | 0.494                         | 1.40E-05       |
| Cd3e        | 2.03                    | 1.31                          | 2.74                          | 1.74E-05       |
| Ifit2       | 0.807                   | 0.502                         | 1.11                          | 3.92E-05       |
| Ciita       | 1.13                    | 0.695                         | 1.56                          | 4.61E-05       |
| Ifi44       | 0.786                   | 0.481                         | 1.09                          | 5.37E-05       |
| Runx1       | 0.968                   | 0.588                         | 1.35                          | 6.16E-05       |
| Eomes       | 0.928                   | 0.542                         | 1.31                          | 0.0001203      |
| Tapbp       | 0.709                   | 0.413                         | 1.01                          | 0.000125       |
| Irf5        | 1.26                    | 0.733                         | 1.79                          | 0.0001252      |
| Icosl       | 0.708                   | 0.411                         | 1.01                          | 0.0001308      |
| Il12rb2     | 1.72                    | 0.985                         | 2.45                          | 0.0001563      |
| Gzmk        | 1.92                    | 1.06                          | 2.77                          | 0.0002614      |
| Sh2d1a      | 1.69                    | 0.92                          | 2.46                          | 0.0003125      |
| Gbp5        | 1.21                    | 0.654                         | 1.78                          | 0.0003617      |
| Nfkbia      | 1.08                    | 0.578                         | 1.58                          | 0.0003878      |
| Ifna1       | 1.1                     | 0.58                          | 1.61                          | 0.0004463      |
| Nod2        | 0.833                   | 0.438                         | 1.23                          | 0.0004669      |
| Irf8        | 0.982                   | 0.489                         | 1.47                          | 0.0008162      |
| H2.T23      | 0.846                   | 0.418                         | 1.27                          | 0.0008728      |
| Ifngr1      | 0.997                   | 0.491                         | 1.5                           | 0.0008995      |
| Tmed1       | -0.177                  | -0.268                        | -0.0862                       | 0.0009915      |
| Irf7        | 0.581                   | 0.271                         | 0.891                         | 0.001405       |
| Ubc         | 0.211                   | 0.0984                        | 0.324                         | 0.001413       |
| Ifnar1      | 0.441                   | 0.203                         | 0.679                         | 0.001546       |
| Ifi44l      | 0.82                    | 0.375                         | 1.26                          | 0.001629       |
| H2.Aa       | 0.913                   | 0.417                         | 1.41                          | 0.001661       |
| Ifna2       | 0.953                   | 0.422                         | 1.48                          | 0.002042       |
| Ifnb1       | 0.785                   | 0.34                          | 1.23                          | 0.002367       |
| Ccr7        | 0.728                   | 0.312                         | 1.14                          | 0.002516       |
| Ifit3       | 0.404                   | 0.172                         | 0.635                         | 0.002564       |
| Masp2       | 0.932                   | 0.394                         | 1.47                          | 0.002713       |
| Cxcl16      | 0.963                   | 0.397                         | 1.53                          | 0.003161       |
| Ddx58       | 0.233                   | 0.0742                        | 0.391                         | 0.009017       |
| Ifna4       | 0.683                   | 0.204                         | 1.16                          | 0.0109         |
| Ifitm2      | 0.144                   | -0.0907                       | 0.378                         | 0.2429         |
| Ifi27       | 0.0915                  | -0.0619                       | 0.245                         | 0.2554         |
| Ifi35       | -0.102                  | -0.311                        | 0.106                         | 0.3462         |

|       |        |         |       |        |
|-------|--------|---------|-------|--------|
| Fadd  | 0.0628 | -0.0909 | 0.216 | 0.4323 |
| Ifit1 | 0.0603 | -0.176  | 0.297 | 0.6219 |

**Supplementary Table 2. Upregulation of genes related to DC function**

| <b>Gene</b> | <b>Log2 fold change</b> | <b>Lower confidence limit</b> | <b>Upper confidence limit</b> | <b>P-value</b> |
|-------------|-------------------------|-------------------------------|-------------------------------|----------------|
| Ikzf2       | 0.891                   | 0.658                         | 1.12                          | 2.37E-07       |
| Ccr2        | 1.99                    | 1.37                          | 2.6                           | 2.89E-06       |
| Ly96        | 0.636                   | 0.419                         | 0.852                         | 1.05E-05       |
| Cd40        | 1.29                    | 0.848                         | 1.74                          | 1.17E-05       |
| Ccl5        | 1.94                    | 1.21                          | 2.67                          | 3.90E-05       |
| Cxcr1       | 1.07                    | 0.662                         | 1.48                          | 4.29E-05       |
| Cd40lg      | 1.23                    | 0.75                          | 1.7                           | 5.38E-05       |
| Ccr5        | 1.32                    | 0.803                         | 1.84                          | 6.26E-05       |
| Ccl19       | 1.62                    | 0.969                         | 2.27                          | 8.11E-05       |
| Cxcr4       | 1.12                    | 0.646                         | 1.59                          | 0.0001414      |
| Cr2         | 0.742                   | 0.398                         | 1.09                          | 0.0003758      |
| Ccr1        | 0.755                   | 0.392                         | 1.12                          | 0.0005327      |
| Cd86        | 1.19                    | 0.568                         | 1.81                          | 0.001181       |
| Rela        | 0.317                   | 0.0828                        | 0.552                         | 0.01493        |
| Cd83        | 0.492                   | -0.0137                       | 0.999                         | 0.07029        |
| Tfrc        | -0.239                  | -0.565                        | 0.0876                        | 0.1663         |

**Supplementary Table 3. Upregulation of genes related to T cell function.**

| Gene    | Log2 fold change | Lower confidence limit | Upper confidence limit | P-value  |
|---------|------------------|------------------------|------------------------|----------|
| Cd2     | 2.15             | 1.64                   | 2.67                   | 5.40E-08 |
| Ikzf2   | 0.891            | 0.658                  | 1.12                   | 2.37E-07 |
| Cd4     | 2.05             | 1.51                   | 2.6                    | 2.95E-07 |
| Tnfsf10 | 1.18             | 0.856                  | 1.5                    | 4.75E-07 |
| Icos    | 2.57             | 1.83                   | 3.3                    | 8.76E-07 |
| Il18r1  | 2.28             | 1.62                   | 2.95                   | 1.08E-06 |
| Ctla4   | 1.82             | 1.29                   | 2.34                   | 1.10E-06 |
| Cd5     | 1.91             | 1.35                   | 2.46                   | 1.15E-06 |
| Btla    | 1.2              | 0.85                   | 1.55                   | 1.18E-06 |
| Ifng    | 1.6              | 1.13                   | 2.07                   | 1.40E-06 |
| Jak2    | 0.614            | 0.43                   | 0.797                  | 1.70E-06 |
| Cd274   | 1.48             | 1.03                   | 1.92                   | 1.89E-06 |
| Cd8a    | 2.14             | 1.49                   | 2.79                   | 2.10E-06 |
| Itgal   | 1.88             | 1.31                   | 2.45                   | 2.17E-06 |
| Gzmb    | 1.99             | 1.38                   | 2.61                   | 2.86E-06 |
| Ccr2    | 1.99             | 1.37                   | 2.6                    | 2.89E-06 |
| Il25    | 1.26             | 0.866                  | 1.66                   | 3.33E-06 |
| Ccr3    | 1.29             | 0.88                   | 1.69                   | 3.81E-06 |
| Stat4   | 1.36             | 0.931                  | 1.8                    | 3.92E-06 |
| Itk     | 1.66             | 1.12                   | 2.21                   | 6.26E-06 |
| Il12rb1 | 1.39             | 0.933                  | 1.85                   | 6.59E-06 |
| Cd8b1   | 1.85             | 1.24                   | 2.47                   | 7.21E-06 |
| Spn     | 1.87             | 1.24                   | 2.49                   | 7.88E-06 |
| Il34    | 1.01             | 0.672                  | 1.35                   | 8.09E-06 |
| Ccl11   | 2.02             | 1.34                   | 2.69                   | 9.02E-06 |
| Il7r    | 2.1              | 1.39                   | 2.81                   | 9.04E-06 |
| Tbx21   | 1.4              | 0.927                  | 1.88                   | 9.79E-06 |
| Cd40    | 1.29             | 0.848                  | 1.74                   | 1.17E-05 |
| Gata3   | 1.51             | 0.981                  | 2.03                   | 1.44E-05 |
| Ptprc   | 1.94             | 1.26                   | 2.63                   | 1.65E-05 |
| Thbd    | 0.964            | 0.622                  | 1.3                    | 1.71E-05 |
| Cd3e    | 2.03             | 1.31                   | 2.74                   | 1.74E-05 |
| Cd27    | 1.5              | 0.964                  | 2.03                   | 1.85E-05 |
| Tlr9    | 1.38             | 0.887                  | 1.88                   | 2.08E-05 |
| Cd3d    | 1.96             | 1.25                   | 2.67                   | 2.13E-05 |
| H2.K1   | 0.606            | 0.387                  | 0.824                  | 2.21E-05 |
| Itgam   | 1.3              | 0.825                  | 1.77                   | 2.42E-05 |
| Ccl3    | 1.62             | 1.03                   | 2.21                   | 2.55E-05 |
| Ripk2   | 0.434            | 0.275                  | 0.593                  | 2.69E-05 |

|         |       |       |       |           |
|---------|-------|-------|-------|-----------|
| Cd247   | 1.68  | 1.06  | 2.3   | 2.95E-05  |
| Cd3g    | 1.97  | 1.24  | 2.69  | 2.95E-05  |
| Dpp4    | 1.65  | 1.03  | 2.27  | 3.47E-05  |
| Cxcr3   | 1.04  | 0.653 | 1.44  | 3.58E-05  |
| Ccl5    | 1.94  | 1.21  | 2.67  | 3.90E-05  |
| Stat6   | 0.255 | 0.158 | 0.352 | 4.12E-05  |
| Tank    | 0.306 | 0.189 | 0.423 | 4.44E-05  |
| Fut7    | 1.11  | 0.685 | 1.54  | 4.52E-05  |
| Ikzf1   | 1.69  | 1.04  | 2.34  | 4.64E-05  |
| Twist1  | 1.05  | 0.646 | 1.45  | 4.68E-05  |
| Psen1   | 0.208 | 0.128 | 0.289 | 4.85E-05  |
| Tbk1    | 0.53  | 0.325 | 0.734 | 5.06E-05  |
| Cd40lg  | 1.23  | 0.75  | 1.7   | 5.38E-05  |
| Ccr6    | 1.14  | 0.695 | 1.59  | 5.66E-05  |
| Ccr5    | 1.32  | 0.803 | 1.84  | 6.26E-05  |
| Icam4   | 0.815 | 0.492 | 1.14  | 6.83E-05  |
| Jak1    | 0.59  | 0.356 | 0.824 | 6.95E-05  |
| Tnfrsf4 | 1.07  | 0.643 | 1.5   | 7.41E-05  |
| Il2rb   | 1.81  | 1.09  | 2.54  | 7.59E-05  |
| Bcl2    | 0.648 | 0.388 | 0.909 | 7.96E-05  |
| Cd1d1   | 1.24  | 0.743 | 1.74  | 8.03E-05  |
| Ccl19   | 1.62  | 0.969 | 2.27  | 8.11E-05  |
| Irak4   | 0.261 | 0.156 | 0.367 | 8.67E-05  |
| Gfi1    | 0.83  | 0.487 | 1.17  | 0.000111  |
| Cd1d2   | 0.83  | 0.487 | 1.17  | 0.0001116 |
| H2.D1   | 0.477 | 0.279 | 0.675 | 0.000115  |
| Eomes   | 0.928 | 0.542 | 1.31  | 0.0001203 |
| Klrk1   | 1.59  | 0.919 | 2.25  | 0.0001345 |
| Cxcr4   | 1.12  | 0.646 | 1.59  | 0.0001414 |
| Itch    | 0.467 | 0.269 | 0.664 | 0.0001449 |
| Tnfsf15 | 1.14  | 0.658 | 1.63  | 0.0001464 |
| Nfatc3  | 0.512 | 0.294 | 0.73  | 0.0001506 |
| Il12rb2 | 1.72  | 0.985 | 2.45  | 0.0001563 |
| Pou2af1 | 1     | 0.572 | 1.43  | 0.0001628 |
| Maf     | 0.915 | 0.521 | 1.31  | 0.0001746 |
| Traf3   | 0.46  | 0.262 | 0.658 | 0.0001762 |
| Cd47    | 0.699 | 0.396 | 1     | 0.0001844 |
| Stat3   | 0.388 | 0.218 | 0.558 | 0.000212  |
| Il6ra   | 1.53  | 0.86  | 2.21  | 0.000214  |
| Cd28    | 0.789 | 0.441 | 1.14  | 0.0002219 |
| Il2     | 0.897 | 0.5   | 1.29  | 0.0002316 |

|           |       |       |       |           |
|-----------|-------|-------|-------|-----------|
| Gzmk      | 1.92  | 1.06  | 2.77  | 0.0002614 |
| Lcp1      | 1.08  | 0.599 | 1.57  | 0.0002628 |
| Il4ra     | 1.03  | 0.567 | 1.49  | 0.0002713 |
| Cd48      | 1.34  | 0.739 | 1.94  | 0.0002724 |
| Tnfrsf13b | 1.03  | 0.568 | 1.5   | 0.0002768 |
| Ccl2      | 0.877 | 0.479 | 1.27  | 0.0003034 |
| Map3k5    | 0.508 | 0.276 | 0.74  | 0.0003193 |
| Card11    | 1.42  | 0.772 | 2.08  | 0.0003306 |
| Tnfsf13   | 0.81  | 0.437 | 1.18  | 0.0003516 |
| Crebbp    | 0.804 | 0.433 | 1.17  | 0.0003588 |
| Stat5b    | 0.385 | 0.207 | 0.563 | 0.0003619 |
| Rag1      | 0.792 | 0.426 | 1.16  | 0.0003704 |
| H2.M3     | 0.657 | 0.35  | 0.963 | 0.0004061 |
| Pdcd1     | 1.71  | 0.912 | 2.51  | 0.0004117 |
| Socs1     | 0.768 | 0.408 | 1.13  | 0.0004225 |
| Nod2      | 0.833 | 0.438 | 1.23  | 0.0004669 |
| Tnfrsf1b  | 1.71  | 0.897 | 2.52  | 0.0004744 |
| Cd80      | 1.04  | 0.545 | 1.53  | 0.0004843 |
| Ccl7      | 1.04  | 0.542 | 1.54  | 0.0005246 |
| Il1rn     | 1.25  | 0.649 | 1.86  | 0.000557  |
| Ncf4      | 1.26  | 0.652 | 1.87  | 0.0005753 |
| Cd59b     | 0.58  | 0.299 | 0.862 | 0.000586  |
| Tlr5      | 0.645 | 0.329 | 0.961 | 0.0006429 |
| Snai1     | 1.03  | 0.522 | 1.54  | 0.0007037 |
| Cma1      | 1.77  | 0.893 | 2.65  | 0.0007289 |
| Csf2      | 0.981 | 0.493 | 1.47  | 0.0007527 |
| Cxcl13    | 1.24  | 0.62  | 1.86  | 0.0007771 |
| Bcl10     | 0.372 | 0.185 | 0.558 | 0.0008024 |
| Il7       | 0.576 | 0.287 | 0.866 | 0.0008223 |
| Tnfsf18   | 0.589 | 0.292 | 0.885 | 0.0008486 |
| Ccr4      | 0.944 | 0.468 | 1.42  | 0.0008491 |
| Fcgr4     | 0.967 | 0.478 | 1.46  | 0.000867  |
| Il6st     | 0.737 | 0.364 | 1.11  | 0.0008773 |
| Pax5      | 1.02  | 0.495 | 1.54  | 0.001026  |
| Ythdf2    | 0.219 | 0.106 | 0.332 | 0.001053  |
| Tlr3      | 0.463 | 0.223 | 0.703 | 0.001103  |
| Cd86      | 1.19  | 0.568 | 1.81  | 0.001181  |
| Ifnar2    | 0.39  | 0.185 | 0.595 | 0.001242  |
| Il4       | 0.901 | 0.427 | 1.37  | 0.001255  |
| Fas       | 1.01  | 0.479 | 1.55  | 0.001257  |
| Nfatc1    | 1.25  | 0.588 | 1.91  | 0.001303  |



|           |       |        |       |          |
|-----------|-------|--------|-------|----------|
| Irf7      | 0.581 | 0.271  | 0.891 | 0.001405 |
| Foxp3     | 0.935 | 0.436  | 1.43  | 0.001412 |
| Ido1      | 0.654 | 0.303  | 1.01  | 0.00149  |
| H2.Aa     | 0.913 | 0.417  | 1.41  | 0.001661 |
| Fasl      | 1.04  | 0.474  | 1.61  | 0.001708 |
| Relb      | 0.634 | 0.286  | 0.981 | 0.001793 |
| H2.Eb1    | 0.982 | 0.443  | 1.52  | 0.001815 |
| Txnip     | 0.752 | 0.336  | 1.17  | 0.001921 |
| Ccr7      | 0.728 | 0.312  | 1.14  | 0.002516 |
| Tollip    | 0.252 | 0.108  | 0.395 | 0.002524 |
| Prkce     | 0.372 | 0.154  | 0.589 | 0.00308  |
| Rora      | 0.615 | 0.254  | 0.976 | 0.003126 |
| H2.Ab1    | 0.88  | 0.353  | 1.41  | 0.003625 |
| Bcl6      | 0.633 | 0.253  | 1.01  | 0.003722 |
| Il17rb    | 0.838 | 0.329  | 1.35  | 0.004054 |
| Tnfsf13b  | 0.829 | 0.325  | 1.33  | 0.004071 |
| Ctsh      | 0.943 | 0.368  | 1.52  | 0.004174 |
| Map4k2    | 0.64  | 0.25   | 1.03  | 0.004183 |
| Il17a     | 0.789 | 0.305  | 1.27  | 0.004322 |
| Cebpb     | 0.783 | 0.301  | 1.26  | 0.004488 |
| Tgfb1     | 0.702 | 0.267  | 1.14  | 0.004701 |
| Cd74      | 0.771 | 0.29   | 1.25  | 0.004936 |
| Foxj1     | 0.665 | 0.241  | 1.09  | 0.005733 |
| Itgae     | 0.496 | 0.179  | 0.814 | 0.005907 |
| Il1b      | 0.837 | 0.3    | 1.37  | 0.006014 |
| Sele      | 0.645 | 0.23   | 1.06  | 0.00615  |
| Il11ra1   | 0.688 | 0.244  | 1.13  | 0.006239 |
| Il18      | 0.235 | 0.0825 | 0.387 | 0.006512 |
| H2.Q2     | 0.584 | 0.205  | 0.964 | 0.006552 |
| Tnfrsf13c | 0.787 | 0.273  | 1.3   | 0.006756 |
| Ccnd3     | 0.229 | 0.0781 | 0.38  | 0.007269 |
| Tmem173   | 0.351 | 0.118  | 0.584 | 0.007603 |
| Ifna4     | 0.683 | 0.204  | 1.16  | 0.0109   |
| Casp3     | 0.226 | 0.0638 | 0.389 | 0.01259  |
| Ikbkg     | 0.262 | 0.0729 | 0.451 | 0.01295  |
| Flt3      | 0.659 | 0.177  | 1.14  | 0.01396  |
| Il12b     | 0.58  | 0.155  | 1.01  | 0.01417  |
| Rela      | 0.317 | 0.0828 | 0.552 | 0.01493  |
| Il13      | 0.526 | 0.132  | 0.92  | 0.01612  |
| Hamp      | 0.564 | 0.141  | 0.986 | 0.01624  |
| Trem2     | 0.797 | 0.197  | 1.4   | 0.01666  |

|         |         |          |         |         |
|---------|---------|----------|---------|---------|
| St6gal1 | 0.315   | 0.0721   | 0.559   | 0.01904 |
| Cxcl12  | 0.947   | 0.199    | 1.69    | 0.0216  |
| Itgb1   | 0.183   | 0.0318   | 0.335   | 0.02738 |
| Mif     | -0.195  | -0.359   | -0.0314 | 0.02952 |
| Tnfsf4  | 0.367   | 0.0588   | 0.676   | 0.02964 |
| lsg20   | 0.354   | 0.0345   | 0.673   | 0.04145 |
| Ptgs2   | 0.777   | 0.0602   | 1.49    | 0.04567 |
| Yy1     | 0.122   | 0.00846  | 0.236   | 0.04741 |
| Lbp     | 0.627   | -0.00449 | 1.26    | 0.06515 |
| Cd276   | 0.164   | -0.00384 | 0.331   | 0.0692  |
| Cd83    | 0.492   | -0.0137  | 0.999   | 0.07029 |
| Vcam1   | 0.532   | -0.018   | 1.08    | 0.07181 |
| Usp18   | 0.194   | -0.0129  | 0.4     | 0.08031 |
| Egr1    | 0.378   | -0.041   | 0.797   | 0.09152 |
| Lcn2    | -0.457  | -1.06    | 0.143   | 0.1502  |
| Gpr44   | 0.397   | -0.145   | 0.938   | 0.1659  |
| Tfrc    | -0.239  | -0.565   | 0.0876  | 0.1663  |
| Irf3    | 0.0944  | -0.0406  | 0.229   | 0.1848  |
| Xbp1    | -0.102  | -0.249   | 0.0454  | 0.1897  |
| Hspb2   | -0.153  | -0.389   | 0.0821  | 0.2156  |
| Anxa1   | 0.118   | -0.0957  | 0.332   | 0.2915  |
| Il1a    | 0.193   | -0.169   | 0.555   | 0.3078  |
| Tie1    | 0.159   | -0.139   | 0.456   | 0.3079  |
| Itgb4   | 0.229   | -0.203   | 0.662   | 0.3107  |
| Psma2   | 0.0486  | -0.0502  | 0.147   | 0.346   |
| Pvr     | 0.0809  | -0.0845  | 0.246   | 0.3486  |
| Tgfb2   | 0.096   | -0.107   | 0.299   | 0.3638  |
| Il22ra2 | -0.203  | -0.654   | 0.247   | 0.3866  |
| Ada     | -0.0681 | -0.232   | 0.0961  | 0.4253  |
| Il5     | 0.123   | -0.313   | 0.558   | 0.5868  |
| Il12a   | 0.0683  | -0.255   | 0.392   | 0.6836  |
| Rorc    | 0.0111  | -0.175   | 0.197   | 0.9082  |
| Mapk3   | -0.0039 | -0.156   | 0.148   | 0.9605  |
